# Supplementary material
Source: PubMed Central journal article supplement (PMC8447597)

## **Appendix Figures**

### **Interactomes of SARS-CoV-2 and human coronaviruses reveal host factors implicated in pathogenesis**

Zhen Chen<sup>1,2</sup>, Chao Wang<sup>1,2</sup>, Xu Feng<sup>1,2</sup>, Litong Nie<sup>1</sup>, Mengfan Tang<sup>1</sup>, Huimin Zhang<sup>1</sup>, Yun Xiong<sup>1</sup>, Samuel K. Swisher<sup>1</sup>, Mrinal Srivastava<sup>1</sup>, and Junjie Chen<sup>1\*</sup>

### **Appendix Table of Contents**

**Appendix Figure S1 - Validation of SARS-CoV-2 protein expression by immunofluorescent staining**

**Appendix Figure S2 - Comparison of HCIPs of N proteins and functional analysis**

**Appendix Figure S1. Validation of SARS-CoV-2 protein expression by immunofluorescent staining (related to Fig 1).**

A, B The green signal is SFB-tagged bait (A) or BioID2-tagged (B), and the blue signal indicates DAPI/nuclei. Scale bar: 10  $\mu$ m.

Appendix Figure S1

A

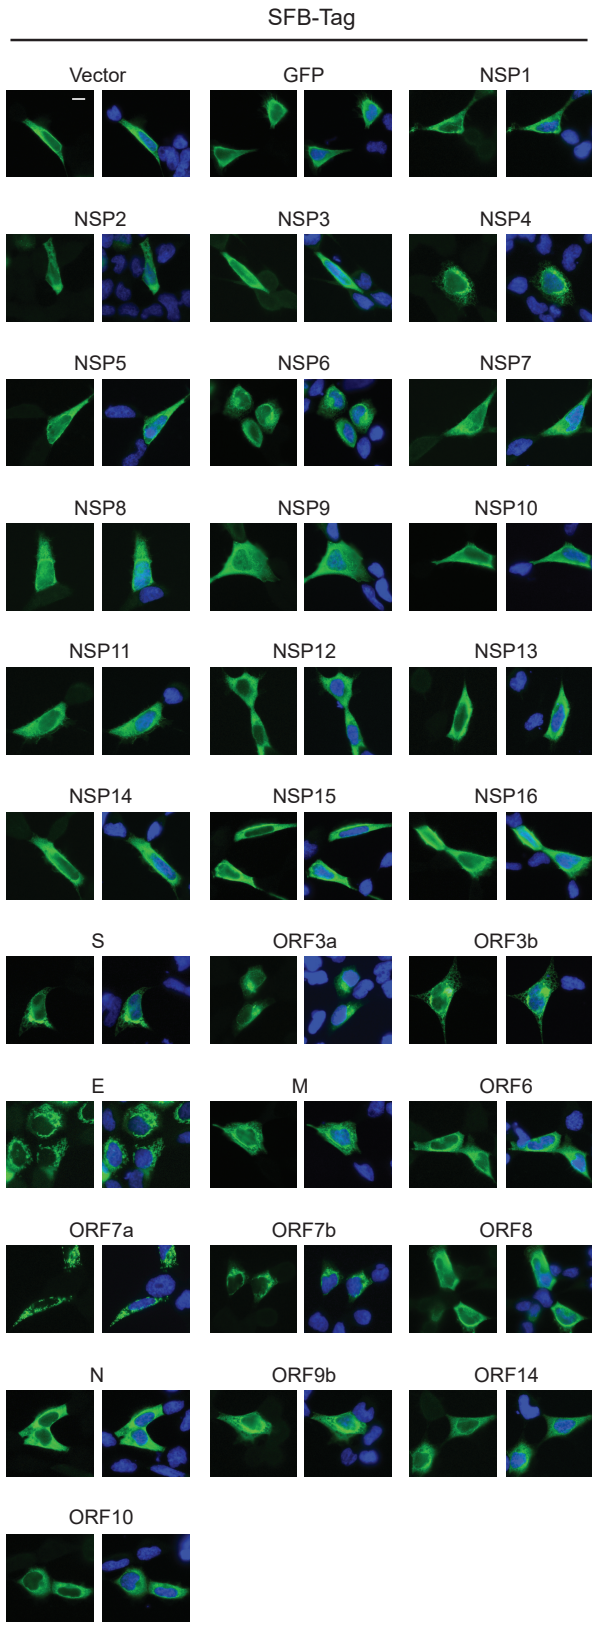

Flag (Green) DAPI (Blue)

B

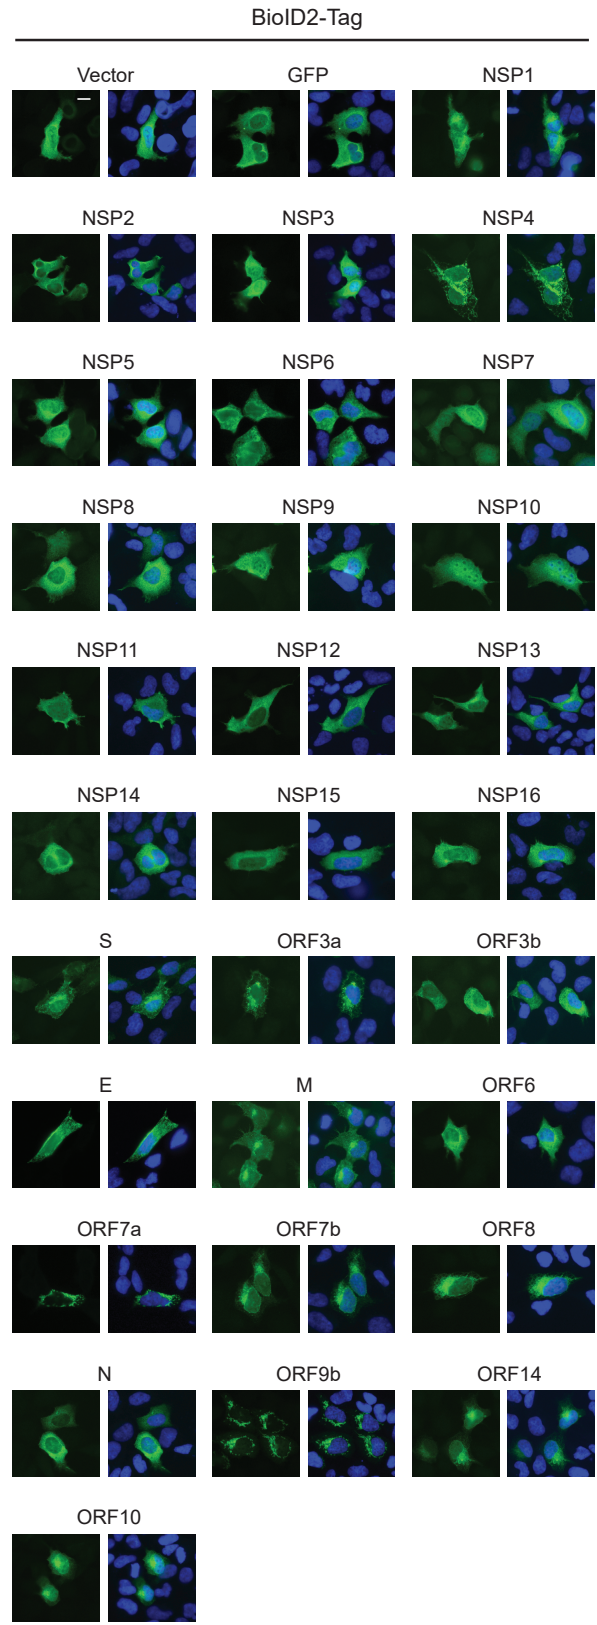

HA (Green) DAPI (Blue)

## **Appendix Figure S2. Comparison of HCIPs of N proteins and functional analysis**

- A HEK293T were infected with Control sgRNA or G3BP1/2 sgRNAs. Cells were then transfected with 5 X ISRE-Luc reporter together with SARS-CoV-N or SARS-N. 24 hours after transfection, Sendai Virus (SeV) was added to the medium of the indicated groups and the cells were incubated for another 12 hours. Cell were harvested and luciferase assays were performed. Graphs show mean  $\pm$  SD, n = 3, \*\*\*p<0.001, n.s. = not significant. The same cell lysates were western blotted with the indicated antibodies (lower right panel).
- B Analysis of mTORC pathway activation with or without the expression of SARS-CoV-2 N in control and G3BP1/2 DKO cells. Western blotting was conducted using indicated antibodies.

# Appendix Figure S2

A

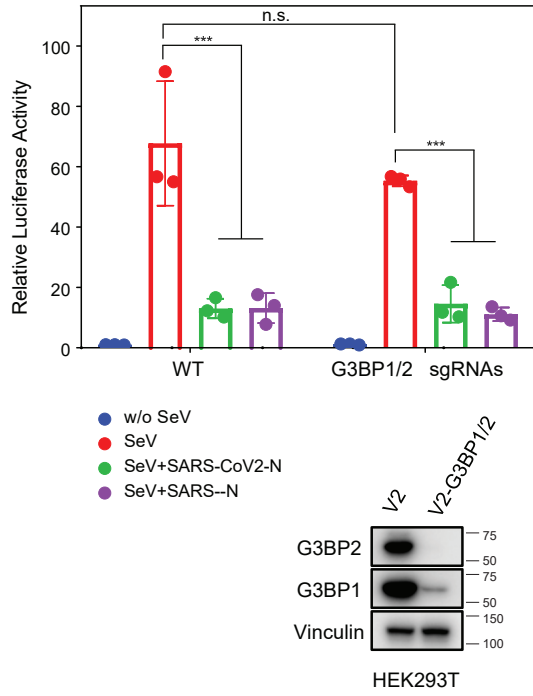

B

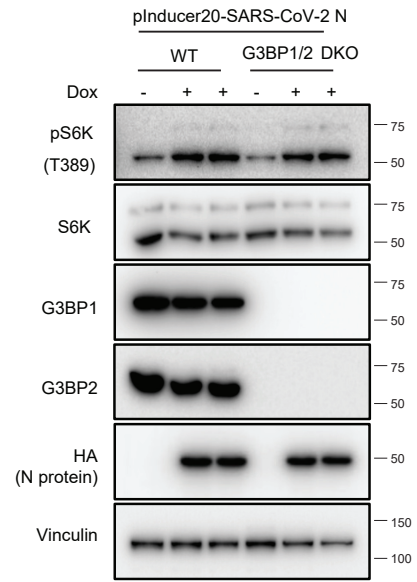

Supplement: EMBJ-40-e107776-s013.pdf [file EMBJ-40-e107776-s013.pdf]
